# Supplementary material
Source: Springer Nature journal article supplement (https://www.springermedizin.de/resource/supplementary/12880_2013_199_MOESM5_ESM.pdf/9450210)

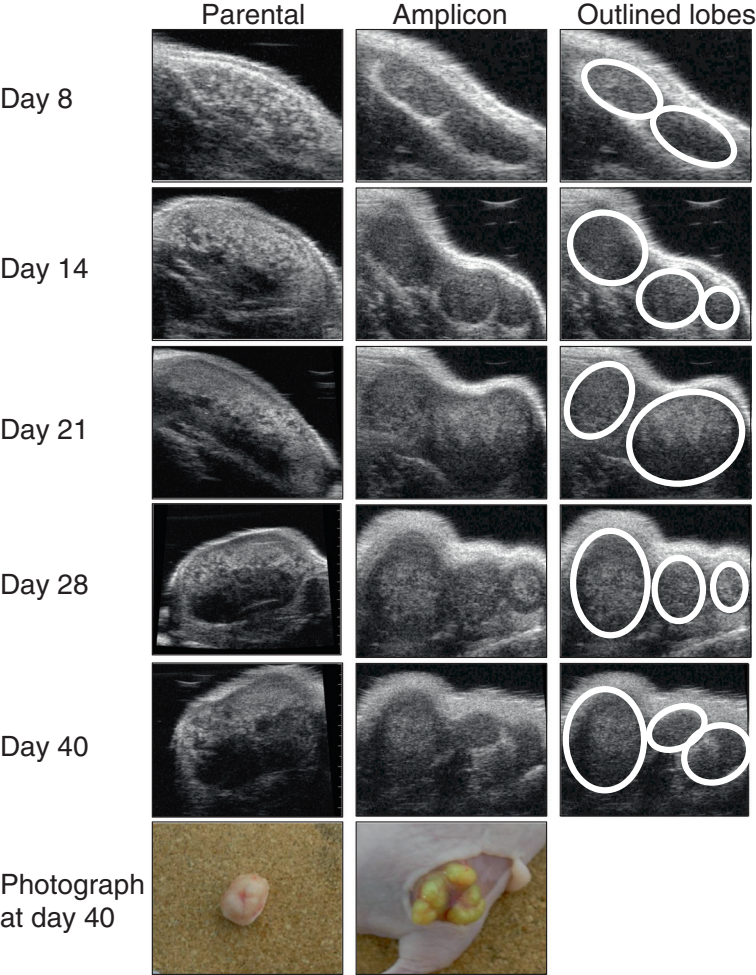

Supplement: MOESM5 [file 9450210]
